# Supplementary material
Source: publisher site journal article supplement (https://www.dovepress.com/article/478842)
Supplement: Supplementary file 1 [file get_supplementary_file.php]

Supplementary table1. Baseline demographic and radiomics of patients with early-stage cervical cancer

| Variables | Training set | | | P-value | Testing set | | | P-value |
| --- | --- | --- | --- | --- | --- | --- | --- | --- |
| Overall(N=152) | PMI(N=50) | Non-PMI(N=102) | Overall(N=66) | PMI(N=18) | Non-PMI(N=48) |
| Age (median [IQR]),year | 53.00 [37.50, 65.50] | 55.00 [35.75, 67.00] | 53.00 [38.00, 65.00] | 0.842 | 50.50 [38.25, 65.00] | 54.00 [44.25, 66.50] | 48.50 [38.00, 64.25] | 0.531 |
| BMI (%),kg/m2 |  |  |  |  |  |  |  |  |
| ≤18.5 | 33 (21.9) | 7 (14.0) | 26 (25.7) | 0.067 | 19 (28.8) | 5 (27.8) | 14 (29.2) | 0.934 |
| 18.6~23.9 | 82 (54.3) | 26 (52.0) | 56 (55.4) |  | 27 (40.9) | 8 (44.4) | 19 (39.6) |  |
| ≥24 | 36 (23.8) | 17 (34.0) | 19 (18.8) |  | 20 (30.3) | 5 (27.8) | 15 (31.2) |  |
| Menopause (%) |  |  |  |  |  |  |  |  |
| Yes | 71 (47.0) | 23 (46.0) | 48 (47.5) | 0.997 | 36 (54.5) | 7 (38.9) | 29 (60.4) | 0.198 |
| No | 80 (53.0) | 27 (54.0) | 53 (52.5) |  | 30 (45.5) | 11 (61.1) | 19 (39.6) |  |
| Gestation (median [IQR]) | 3.00 [2.00, 6.00] | 4.00 [1.25, 6.75] | 3.00 [2.00, 6.00] | 0.364 | 3.00 [1.25, 6.00] | 3.00 [1.25, 5.75] | 3.00 [1.75, 6.00] | 0.867 |
| Production (median [IQR]) | 2.00 [1.00, 3.00] | 2.00 [1.00, 3.00] | 2.00 [0.00, 3.00] | 0.123 | 2.00 [1.00, 3.00] | 2.50 [1.00, 3.75] | 2.00 [0.75, 3.00] | 0.328 |
| Smoking (%) |  |  |  |  |  |  |  |  |
| Yes | 51 (33.8) | 18 (36.0) | 33 (32.7) | 0.823 | 19 (28.8) | 4 (22.2) | 15 (31.2) | 0.677 |
| No | 100 (66.2) | 32 (64.0) | 68 (67.3) |  | 47 (71.2) | 14 (77.8) | 33 (68.8) |  |
| HPV (%) |  |  |  |  |  |  |  |  |
| Positive | 96 (63.6) | 34 (68.0) | 62 (61.4) | 0.538 | 47 (71.2) | 16 (88.9) | 31 (64.6) | 0.102 |
| Negative | 55 (36.4) | 16 (32.0) | 39 (38.6) |  | 19 (28.8) | 2 (11.1) | 17 (35.4) |  |
| SCC (median [IQR]), μg/L | 5.60 [4.15, 7.05] | 5.65 [4.43, 7.20] | 5.60 [3.90, 7.00] | 0.501 | 5.75 [3.90, 7.42] | 6.20 [4.15, 8.50] | 5.15 [3.88, 6.67] | 0.127 |
| Histology (%) |  |  |  |  |  |  |  |  |
| SCC | 109 (72.2) | 35 (70.0) | 74 (73.3) | 0.819 | 40 (60.6) | 9 (50.0) | 31 (64.6) | 0.425 |
| Non-SCC | 42 (27.8) | 15 (30.0) | 27 (26.7) |  | 26 (39.4) | 9 (50.0) | 17 (35.4) |  |
| FIGO (%) |  |  |  |  |  |  |  |  |
| IB | 91 (60.3) | 34 (68.0) | 57 (56.4) | 0.234 | 44 (66.7) | 11 (61.1) | 33 (68.8) | 0.769 |
| IIA | 60 (39.7) | 16 (32.0) | 44 (43.6) |  | 22 (33.3) | 7 (38.9) | 15 (31.2) |  |
| Grade (%) |  |  |  |  |  |  |  |  |
| G1 | 55 (36.4) | 13 (26.0) | 42 (41.6) | 0.161 | 26 (39.4) | 10 (55.6) | 16 (33.3) | 0.201 |
| G2 | 49 (32.5) | 18 (36.0) | 31 (30.7) |  | 20 (30.3) | 5 (27.8) | 15 (31.2) |  |
| G3 | 47 (31.1) | 19 (38.0) | 28 (27.7) |  | 20 (30.3) | 3 (16.7) | 17 (35.4) |  |
| Tumor diameter (median [IQR]),cm | 5.00 [2.90, 8.05] | 5.35 [3.00, 8.60] | 5.00 [2.90, 7.90] | 0.822 | 5.20 [3.10, 8.40] | 4.60 [3.15, 8.20] | 6.05 [3.00, 8.62] | 0.708 |
| LNM (%) |  |  |  |  |  |  |  |  |
| Yes | 42 (27.8) | 13 (26.0) | 29 (28.7) | 0.875 | 16 (24.2) | 5 (27.8) | 11 (22.9) | 0.93 |
| No | 109 (72.2) | 37 (74.0) | 72 (71.3) |  | 50 (75.8) | 13 (72.2) | 37 (77.1) |  |
| Treatment (%) |  |  |  |  |  |  |  |  |
| Surgery | 56 (37.1) | 16 (32.0) | 40 (39.6) | 0.624 | 23 (34.8) | 7 (38.9) | 16 (33.3) | 0.806 |
| Surgery+CT | 58 (38.4) | 20 (40.0) | 38 (37.6) |  | 30 (45.5) | 7 (38.9) | 23 (47.9) |  |
| Surgery+CT+RT | 37 (24.5) | 14 (28.0) | 23 (22.8) |  | 13 (19.7) | 4 (22.2) | 9 (18.8) |  |
| Ki67 (median [IQR]) | 0.50 [0.40, 0.60] | 0.50 [0.32, 0.60] | 0.50 [0.40, 0.60] | 0.611 | 0.50 [0.40, 0.60] | 0.40 [0.30, 0.50] | 0.50 [0.40, 0.70] | 0.067 |
| Energy (median [IQR]) | 7.04 [4.21, 9.57] | 11.15 [9.75, 12.21] | 5.01 [3.22, 7.09] | <0.001 | 5.64 [2.75, 8.96] | 11.54 [10.14, 12.49] | 4.20 [2.35, 6.20] | <0.001 |
| Contrast (median [IQR]) | 318.80 [267.20, 359.85] | 310.90 [258.35, 365.37] | 323.40 [272.70, 356.20] | 0.533 | 300.60 [271.70, 345.67] | 346.40 [290.90, 358.78] | 293.45 [263.33, 334.60] | 0.012 |
| Correlation (median [IQR]) | 2.47 [2.06, 59.85] | 64.25 [60.23, 73.88] | 2.24 [1.95, 2.47] | <0.001 | 2.45 [2.09, 52.55] | 64.60 [55.62, 73.95] | 2.24 [1.96, 2.50] | <0.001 |
| SOS (median [IQR]) | 1.51 [1.12, 1.92] | 1.65 [1.30, 1.99] | 1.39 [1.08, 1.90] | 0.04 | 1.42 [1.14, 1.83] | 1.74 [1.31, 1.95] | 1.37 [1.10, 1.75] | 0.127 |
| IND (median [IQR]) | 1.49 [1.02, 2.32] | 0.80 [0.54, 1.04] | 2.08 [1.48, 2.53] | <0.001 | 1.75 [1.07, 2.34] | 0.81 [0.73, 1.00] | 2.11 [1.61, 2.46] | <0.001 |
| MES (median [IQR]) | -0.69 [-0.88, -0.49] | -1.10 [-1.36, -0.89] | -0.56 [-0.69, -0.40] | <0.001 | -0.63 [-0.85, -0.44] | -1.28 [-1.38, -1.05] | -0.55 [-0.66, -0.39] | <0.001 |
| SUV (median [IQR]) | 18.60 [15.65, 21.80] | 18.25 [15.53, 21.77] | 18.70 [15.90, 21.70] | 0.421 | 18.75 [14.98, 21.87] | 17.85 [14.53, 20.32] | 18.80 [15.50, 22.33] | 0.357 |
| SUE (median [IQR]) | 0.49 [0.37, 0.74] | 0.83 [0.75, 0.93] | 0.42 [0.34, 0.49] | <0.001 | 0.46 [0.35, 0.69] | 0.88 [0.77, 0.94] | 0.40 [0.34, 0.47] | <0.001 |
| Entropy (median [IQR]) | 0.58 [0.44, 0.93] | 1.27 [0.94, 1.56] | 0.49 [0.39, 0.58] | <0.001 | 0.54 [0.36, 0.82] | 1.24 [0.91, 1.45] | 0.44 [0.33, 0.55] | <0.001 |
| DIV (median [IQR]) | 319.50 [193.75, 408.50] | 446.50 [410.75, 477.50] | 227.00 [168.50, 320.25] | <0.001 | 299.00 [179.75, 387.75] | 424.00 [405.25, 474.00] | 253.00 [150.50, 307.25] | <0.001 |
| DIE (median [IQR]) | 187.00 [164.00, 206.50] | 186.50 [165.00, 207.75] | 187.00 [164.00, 206.00] | 0.79 | 197.50 [171.25, 213.00] | 192.50 [177.00, 208.50] | 197.50 [171.00, 214.00] | 0.88 |

Abbreviations:IQR: inter-quartile range;BMI: body mass index;HPV: human papillomavirus;SCC: squamous cell carcinoma antigen;FIGO: The International Federation of Gynecology and Obstetrics;LNM: lymph node metastasis;CT: chemotherapy;RT: radiotherapy;SOS: sum of squares;IND: inverse difference;MES: mean sum;SUV: sum variance;SUE: sum entropy;DIV: difference variance;DIE: difference entropy.

Supplementary table2. Weight distribution of candidate variables based on RFM

| Variables | %IncMSE | IncNodePurity |
| --- | --- | --- |
| Energy | 11.60701425 | 3.074696596 |
| Contrast | -0.008570834 | 0.029577853 |
| Correlation | 20.4002053 | 11.01717964 |
| SOS | 1.513617617 | 0.067566802 |
| IND | 7.120716808 | 1.263888572 |
| MES | 11.43393383 | 4.026910586 |
| SUV | 1.000500375 | 0.006445409 |
| SUE | 18.02132924 | 9.377859568 |
| Entropy | 15.93202602 | 8.051597765 |
| DIV | 17.67810923 | 9.511165087 |
| DIE | 1.291084864 | 0.017308301 |

Abbreviations: SOS: sum of squares;IND: inverse difference;MES: mean sum;SUV: sum variance;SUE: sum entropy;DIV: difference variance;DIE: difference entropy.


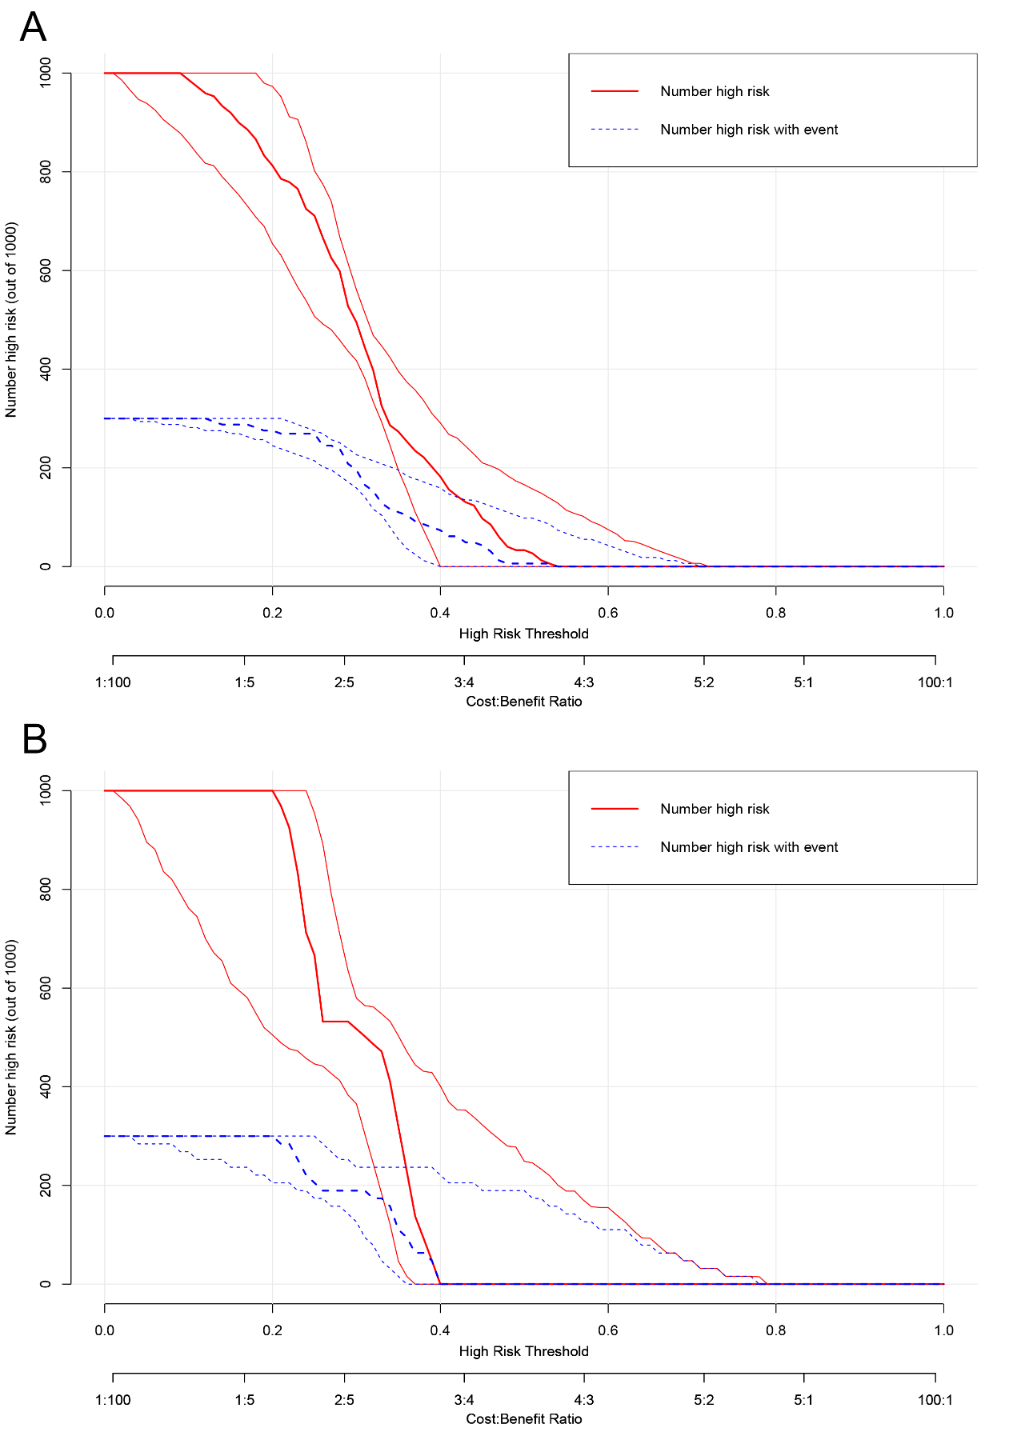


Supplementary Figure1. Identification ability of patients with bone metastasis based on CIC evaluation of RFM.A. Training Set; B. Internal validation set.
